# Supplementary material for: Are Marine Heatwaves Responsible for Mortalities of Farmed Mytilus galloprovincialis? A Pathophysiological Analysis of Marteilia Infected Mussels from Thermaikos Gulf, Greece
Source: MDPI journal article supplement (doi:10.3390/ani12202805), 2022-10-17

# **Are marine heatwaves responsible for mortalities of farmed *Mytilus galloprovincialis* mussels? A case study in Thermaikos gulf, Greece**

**Athanasios Lattos<sup>1\*</sup>, Dimitrios K. Papadopoulos<sup>1</sup>, Kostantinos Feidantsis<sup>1</sup>,  
Ioannis A. Giantsis<sup>2</sup>, Dimitrios Karagiannis<sup>3</sup> and Basile Michaelidis<sup>1\*</sup>**



**Figure S2:** The complete original immunoblots shown in Figure 9 are presented in order below. The individual parts comprising Figure 9 are specified using black boxes.

**Cropped blots in main paper**

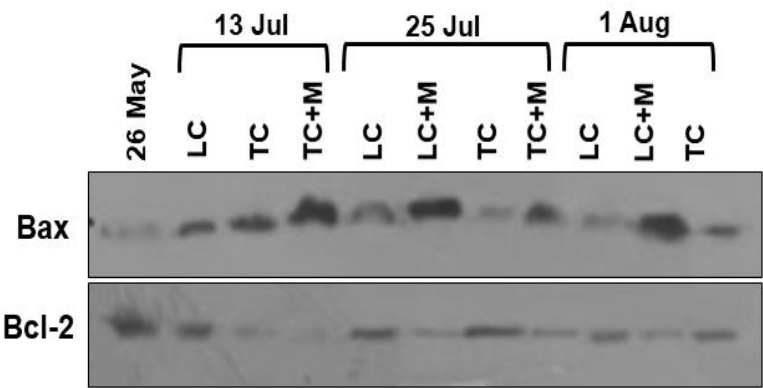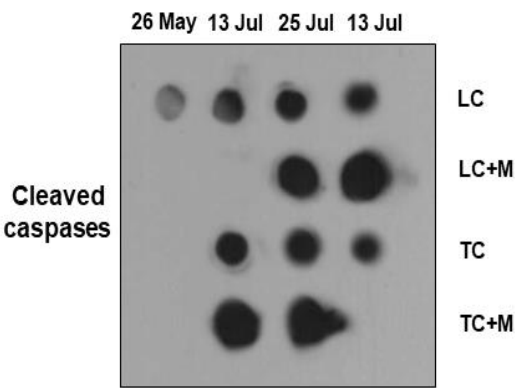

**Original blots**

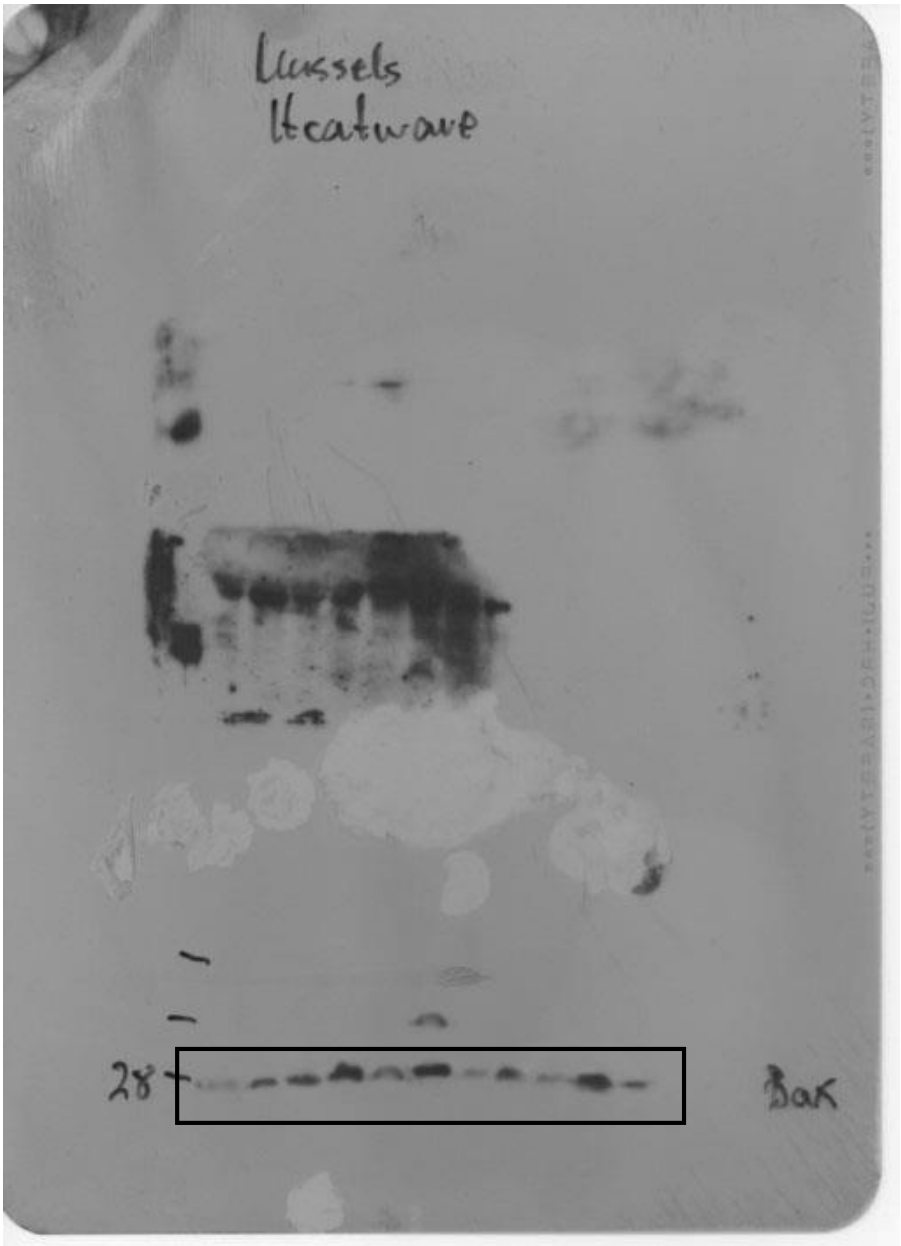

**Figure S3:** The complete original immunoblots shown in Figure 9 are presented in order below. The individual parts comprising Figure 9 are specified using black boxes.

**Cropped blots in main paper**

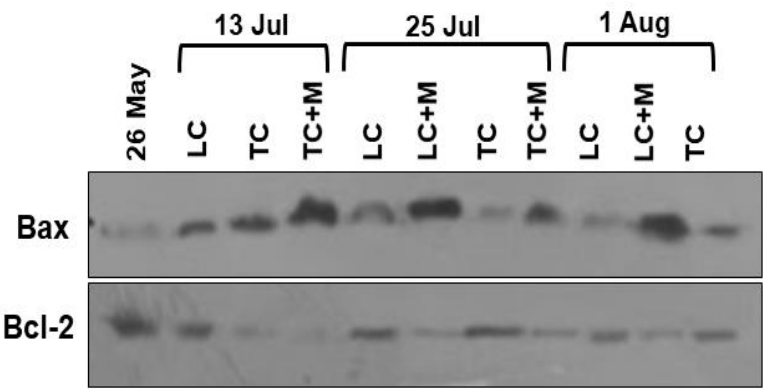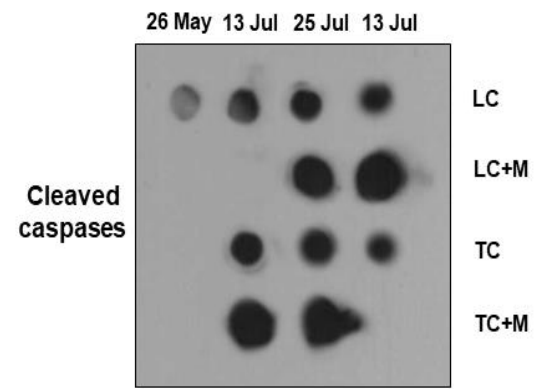

**Original blots**

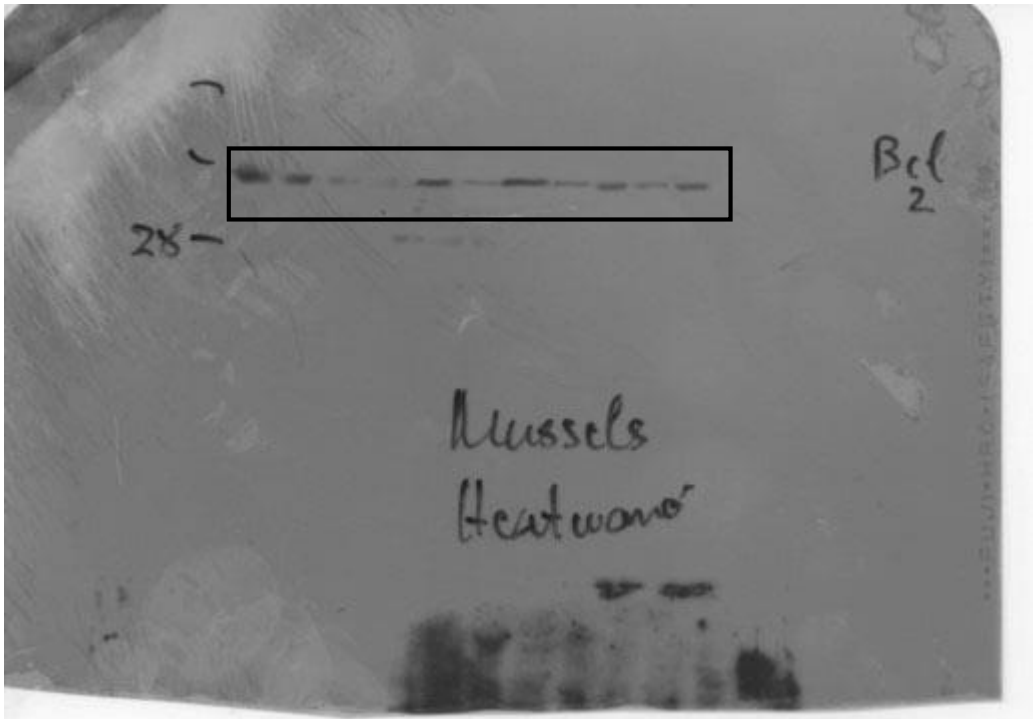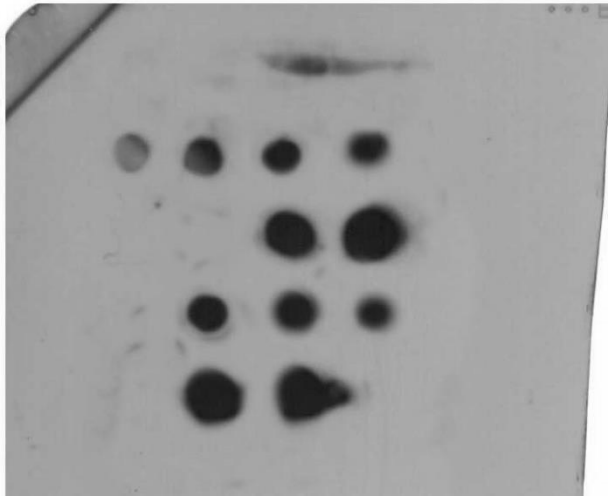

**Figure S4:** The complete original immunoblots shown in Figure 11 are presented in order below. The individual parts comprising Figure 11 are specified using black boxes.

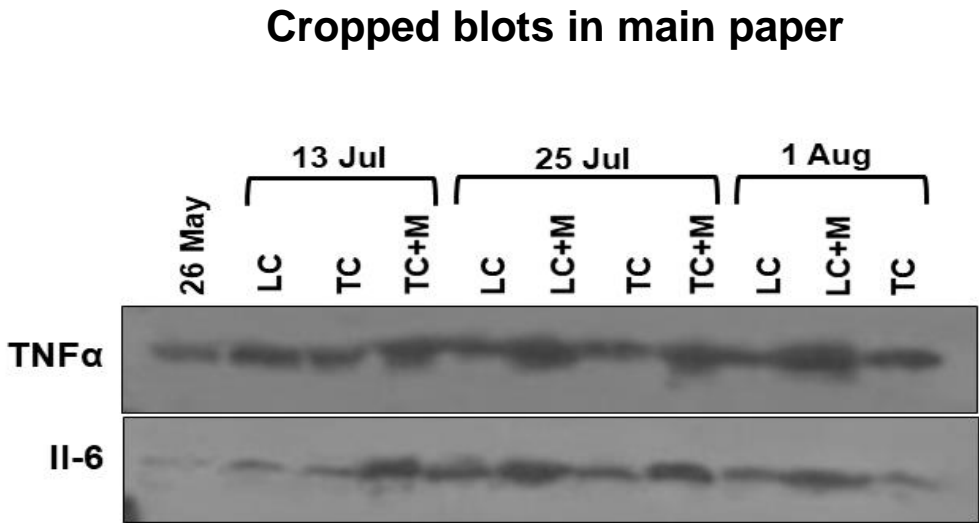

**Original blots**

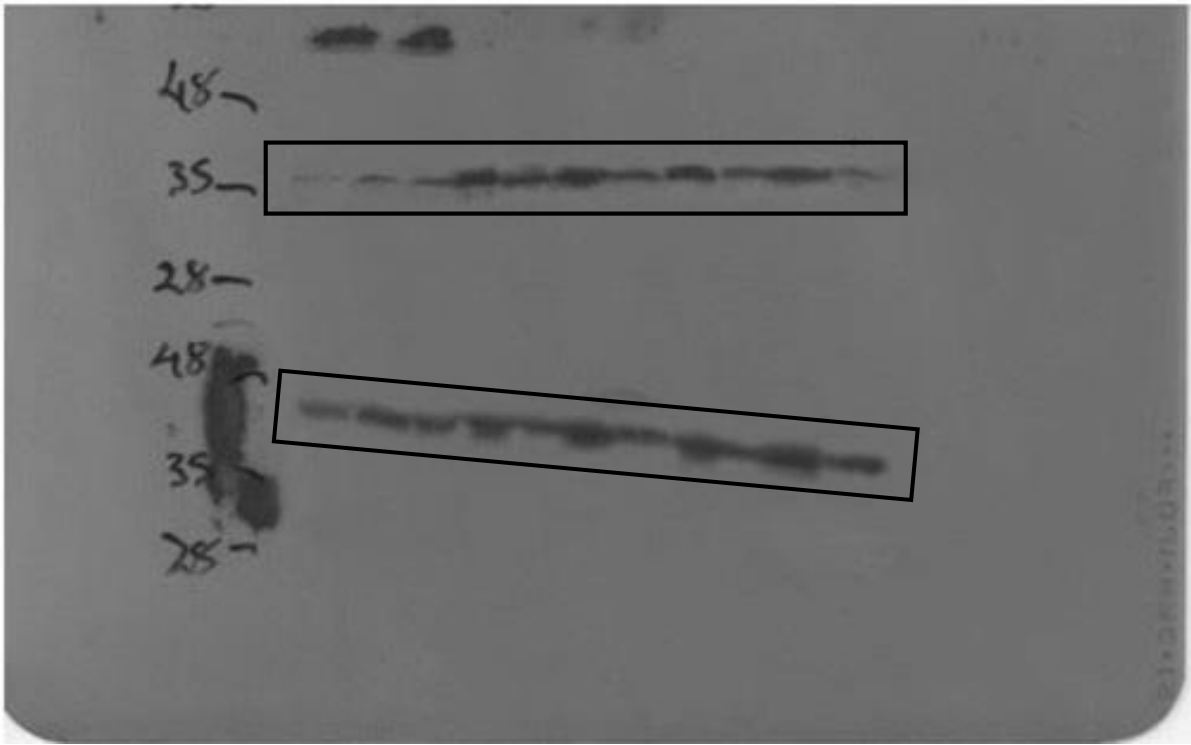

Supplement: s1 [file s1]
